# Supplementary material
Source: PubMed Central journal article supplement (PMC3386353)
Supplement: NIHMS377601-supplement-1.pdf [file NIHMS377601-supplement-1.pdf]

# Pattern, and not magnitude of neural activity determines dendritic spine stability in awake mice

Ryan M. Wyatt, Elaine Tring, Joshua T. Trachtenberg

## Supplementary Information

- Page 2     Supplementary Figure 1. GAPDH, GFP and ChR2 expression in transgenic and control brains.
- Page 3     Supplementary Figure 2. Spontaneous firing rates of layer 5 neurons in awake mice.
- Page 4     Supplementary Figure 3. Optical stimulation paradigm

## Supplementary Figure 1

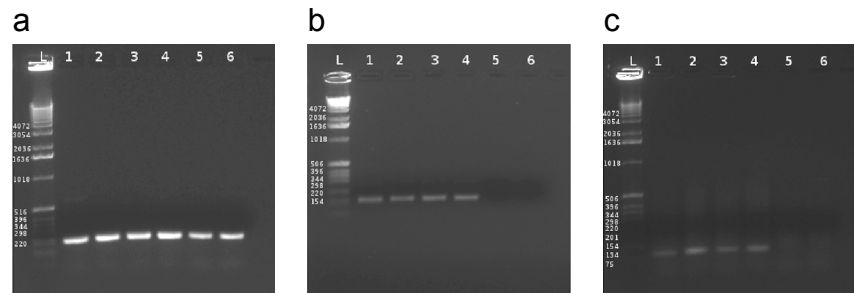

**Supplementary Figure 1. GAPDH, GFP and ChR2 expression in transgenic and control brains.** Layer 5 GFP positive cells were laser captured from 4 double transgenic brains (Lanes 1-4). Layer 5 cells were also captured from 2 wild type control brains (Lanes 5 and 6). RNA was isolated, amplified and converted to cDNA. PCR was performed for the housekeeping gene GAPDH (a), and the transgenic genes GFP (b) and ChR2 (c). The numbers on the left indicate the size of the ladder bands. cDNA amplicon sizes: GAPDH, 211 base pairs; eGFP, 150 base pairs; ChR2, 94 base pairs. There is a similar level of GAPDH cDNA in all samples. However, the eGFP and ChR2 transgenes are only present in the transgenic brains, lanes 1-4.

Supplementary Figure 2

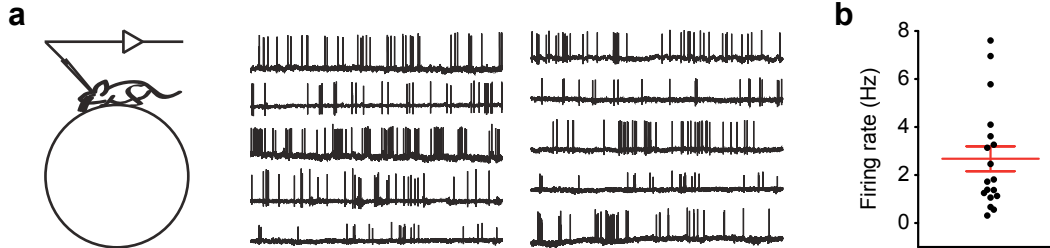

**Supplementary Figure 2. Spontaneous firing rates of layer 5 neurons in awake mice.** (a) Cartoon of a mouse on a floating Styrofoam ball with a patch pipette inserted into layer 5 of somatosensory cortex. Recordings from awake mice maneuvering on this ball permitted accurate measures of spontaneous firing rates. Example traces of 10 isolated layer 5 neurons from awake mice are shown. Each trace is 20 seconds in duration. (b) Plot of mean firing rates for all 18 recorded neurons from 5 mice. Red bars show the mean and standard error of this distribution ( $2.4 \pm 0.5$  Hz).

### Supplementary Figure 3

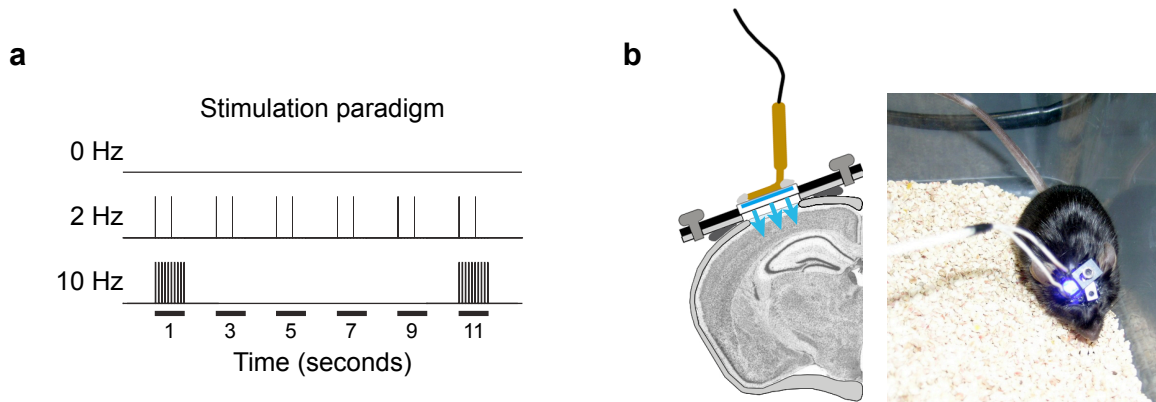

**Supplementary Figure 3. Optical stimulation paradigm.** (a) Schematic showing the pattern of light stimulation in control mice (0 Hz), 2 Hz, and 10 Hz groups. Note that the pattern differs but the total number of spikes is the same between the 2 Hz and 10 Hz groups (average 1 Hz). (b, left) Schematic showing a cross section through one hemisphere of a mouse brain. A blue LED embedded in a removable head mount is secured via two screws to a headbar attached to the skull via dental acrylic. A flexible wire tethers the diode to a controller. A small piece of coverglass replaces a similarly sized piece of skull to permit high optical access to the underlying cortex. (b, right) Photograph of a mouse tethered to the head-mounted blue LED.
